# Supplementary material for: Combination Therapy with a TLR7 Agonist and a BRD4 Inhibitor Suppresses Tumor Growth via Enhanced Immunomodulation
Source: MDPI journal article supplement (doi:10.3390/ijms25010663), 2024-01-04
Supplement: s1 [file s1]

*Supplementary Material*

**1 Supplementary Figures**

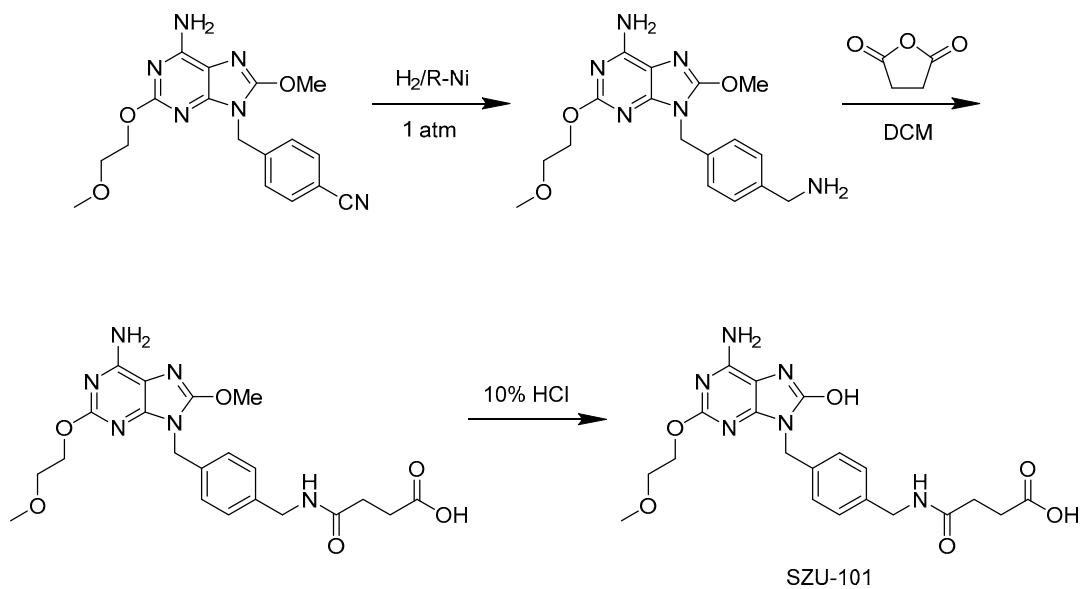

**Supplementary Figure S1. Schematic illustration of the synthesis of SZU-101.**

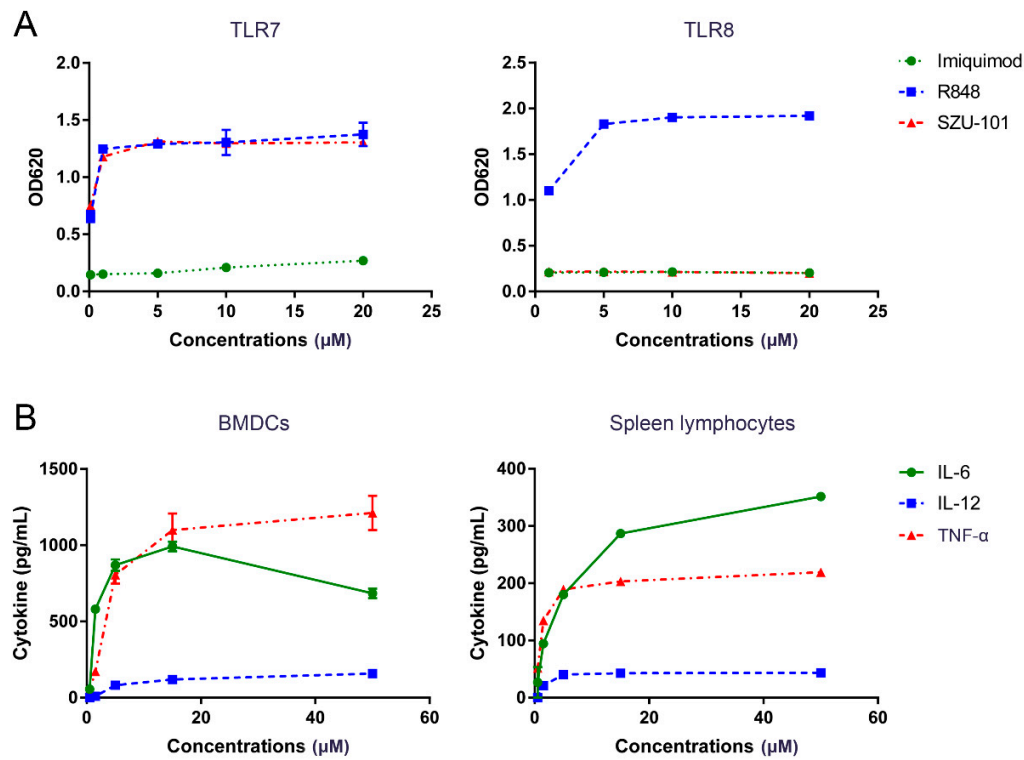

**Supplementary Figure S2. SZU-101 stimulated TLR7 signaling and primed immune responses in vitro.** (A) HEK-Blue hTLR7 and hTLR8 cells were treated with SZU-101 for 24 h, and final OD values were recorded at 620 nm. (B) Mouse BMDCs and spleen lymphocytes were treated with SZU-101 for 24 h, and cytokine levels (IL-6, IL-12 and TNF- $\alpha$ ) were quantified by ELISA. Data represent mean  $\pm$  SE ( $n = 3$ ).

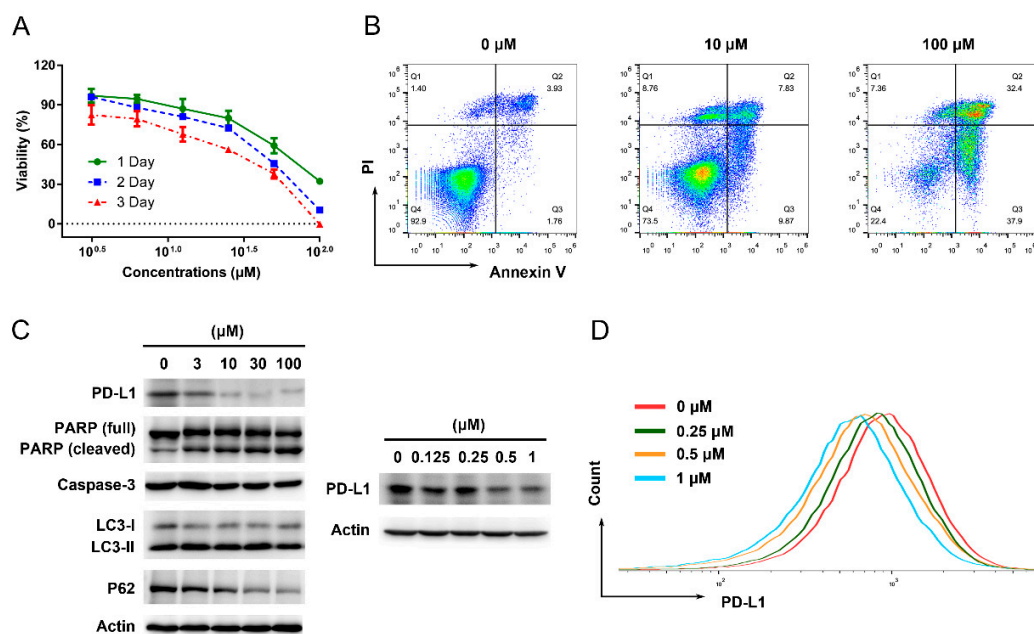

**Supplementary Figure S3. JQ-1 displayed growth inhibition on 4T1 cells in vitro.** (A) Growth inhibition on 4T1 cells treated by JQ-1 for 1-3 days, determined by CCK-8 assay. (B) Annexin V-FITC/PI analysis of 4T1 cells treated by JQ-1 for 24 h. (C) Detection of the proteins of 4T1 cells treated by JQ-1 for 24 h, determined by western blot, including PD-L1, PARP, Caspase-3, LC3B and P62. (D) Detection of PD-L1 of 4T1 cells treated by JQ-1 for 24 h, determined by flow cytometry. Data represent mean  $\pm$  SE ( $n = 3$ ).

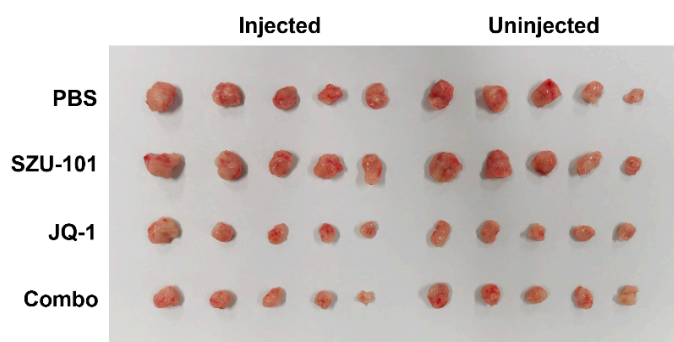

**Supplementary Figure S4. Representative images of the excised tumors of 4T1-bearing Balb/c mice treated with SZU-101 and JQ-1.**

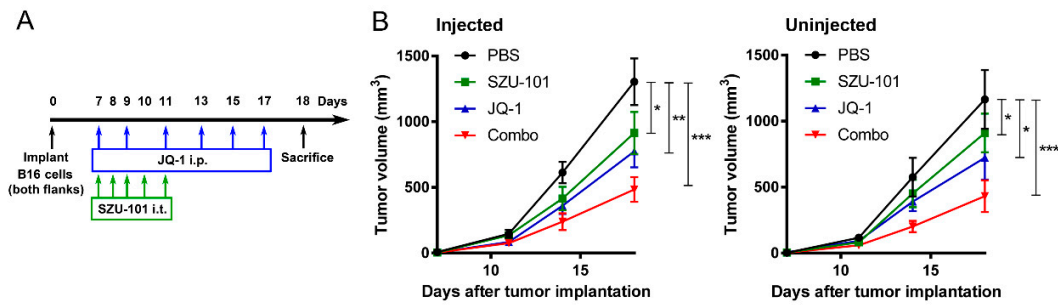

**Supplementary Figure S5. Combination administration of SZU-101 and JQ-1 inhibited melanoma growth at both injected and uninjected sites.** (A) Experimental protocol of combination therapy with SZU-101 and JQ-1. C57BL/6J mice ( $n = 5-6/\text{group}$ ) were implanted with  $2 \times 10^5$  B16 cells in both flanks, and i.t. treated with SZU-101 and i.p. treated with JQ-1. (B) Tumor volumes at both injected and uninjected sites were monitored. Data represent mean  $\pm$  SE, \*  $P < 0.05$ , \*\*  $P < 0.01$ , \*\*\*  $P < 0.001$  (two-way ANOVA with Bonferroni post hoc test).

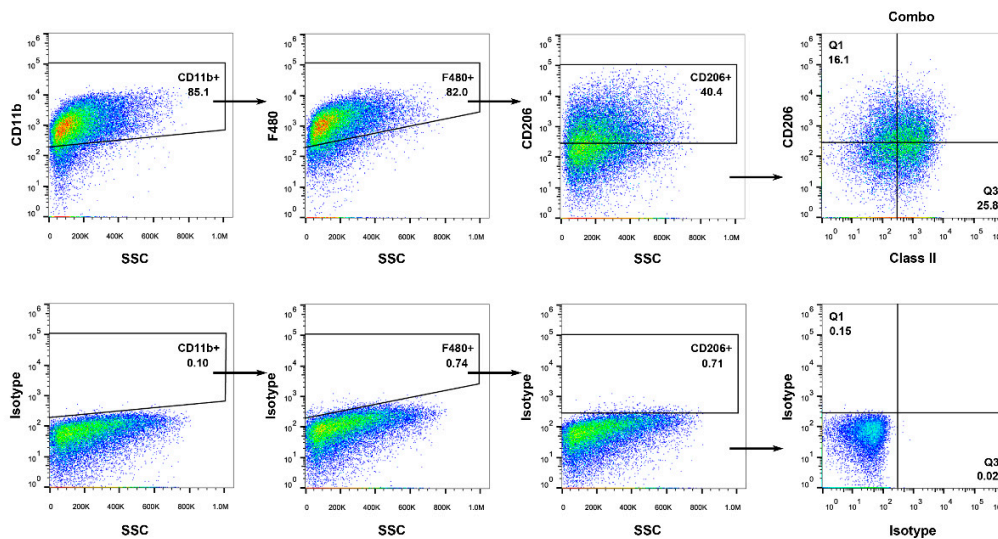

**Supplementary Figure S6. Representative flow cytometric plots of M1 and M2 macrophages in TAMs.** The single cell suspensions of tumors were prepared and stained for CD45, CD11b and F4/80 to identify TAMs. Tumor infiltrating M1 and M2 macrophages were identified as CD206<sup>-</sup> and CD206<sup>+</sup> populations in TAMs, respectively. M1 and M2 macrophages were further identified as CD206<sup>-</sup>Class II<sup>+</sup> and CD206<sup>+</sup>Class II<sup>-</sup> populations, respectively. Representative plots of cells after staining with isotype antibodies were shown on the lower panel.

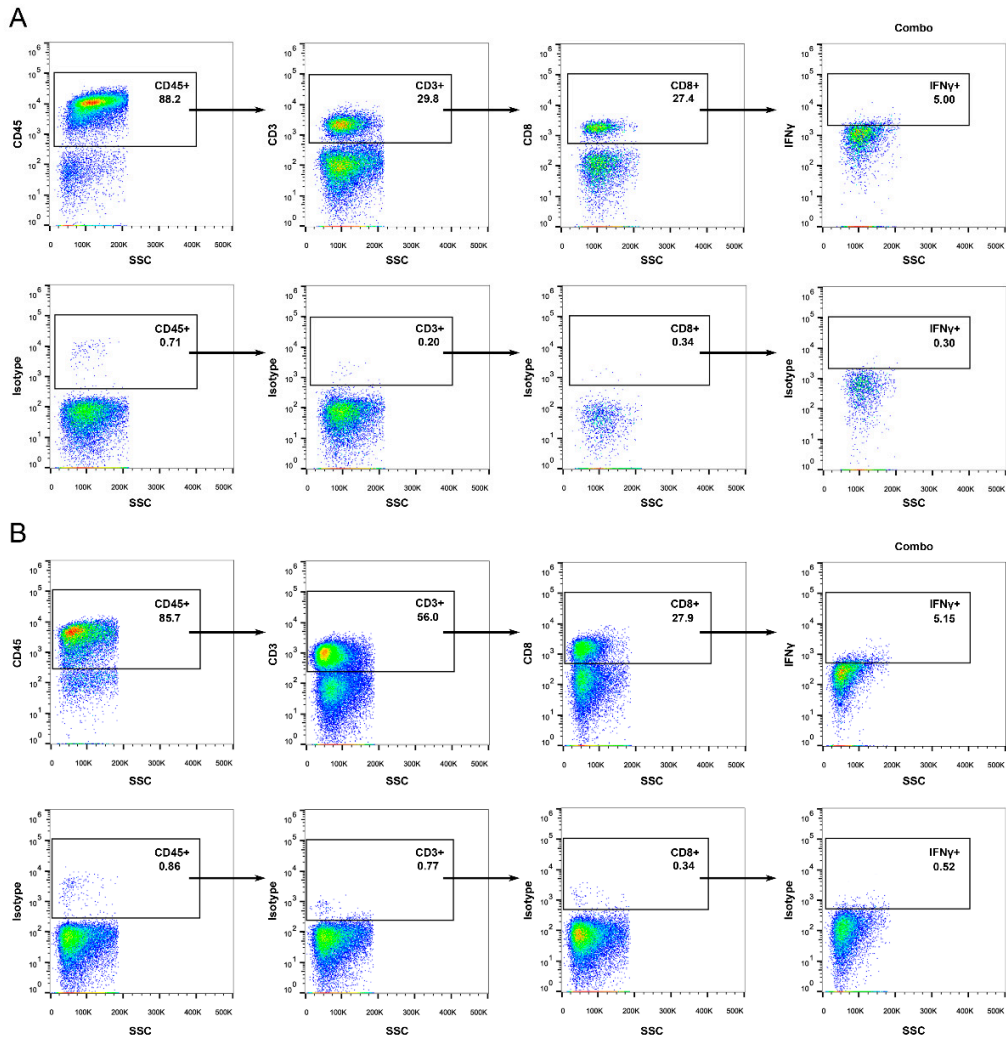

**Supplementary Figure S7. Representative flow cytometric plots of CD8<sup>+</sup> T cells in spleens (A) and TILs (B).** The single cell suspensions of spleens and tumors were prepared and stained for CD45, CD3, CD8 and intracellular IFN $\gamma$  to identify CD8<sup>+</sup>IFN $\gamma$ <sup>+</sup> T cells. Representative plots of cells after staining with isotype antibodies were shown on the lower panel.

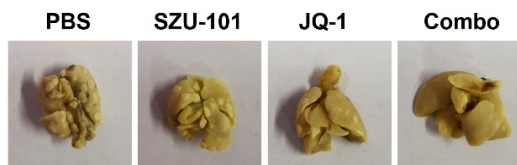

**Supplementary Figure S8. Representative images of the excised lungs of 4T1-bearing Balb/c mice treated with SZU-101 and JQ-1.**

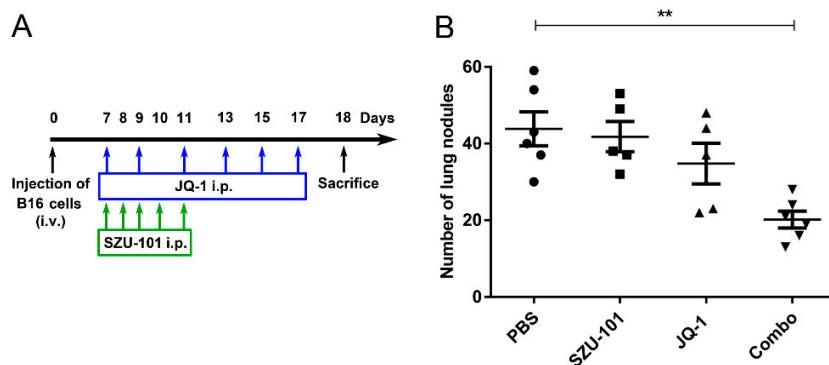

**Supplementary Figure S9. Combination administration of SZU-101 and JQ-1 inhibited melanoma metastasis.** (A) Experimental protocol of tumor lung metastasis. C57BL/6J mice ( $n = 5-6/\text{group}$ ) were intravenously injected through the tail vein with  $5 \times 10^4$  B16 cells on Day 0, and i.p. treated with SZU-101 and JQ-1. (B) Numbers of lung nodules were counted on Day 18. Data represent mean  $\pm$  SE, \*\*  $P < 0.01$  (one-way ANOVA with Tukey's post hoc test).

## 2 Supplementary Table

**Supplementary Table S1. Supplementary Table I Antibodies used in flow cytometry analysis.**

| Antibody      | Color       | Cat#   | Source    |
|---------------|-------------|--------|-----------|
| CD45          | BV605       | 103140 | BioLegend |
| CD3           | FITC        | 100204 | BioLegend |
| CD8           | PerCP/Cy5.5 | 100734 | BioLegend |
| PD-L1         | APC         | 124312 | BioLegend |
| IFN- $\gamma$ | BV421       | 505830 | BioLegend |
| CD11b         | FITC        | 101206 | BioLegend |
| F4/80         | PerCP/Cy5.5 | 123128 | BioLegend |
| CD206         | APC         | 141708 | BioLegend |
| MHC Class II  | APC/Cy7     | 107628 | BioLegend |
